# Supplementary material for: Sind Judentum und Christentum so gewalttätig wie der Islam
Source: MDPI journal article supplement (doi:10.3390/nu15204393), 2009-06-01
Supplement: s1 [file s1]

**Table S1.** Disease Activity Index score

| Score | Weight loss rate (%) | Stool properties | Fecal occult blood |
|-------|----------------------|------------------|--------------------|
| 0     | 0                    | Normal           | Negative           |
| 1     | 1-5                  | Weak soft stool  | Weak positive      |
| 2     | 6-10                 | Soft stool       | Positive           |
| 3     | 11-15                | Mucus-like stool | Strong positive    |
| 4     | >15                  | Watery stool     | Blood fecal stool  |
